# Supplementary material for: Cytokine expression profiles of immune imbalance in post-mononucleosis chronic fatigue
Source: PubMed Central journal article supplement (PMC3480896; doi:10.1186/1479-5876-10-191), 2012-09-13
Supplement: 1479-5876-10-191-S1.pdf [file 1479-5876-10-191-S1.pdf]

**Table S1 (a). Assay Performance Measures.** Calibration standard sample concentrations used and the corresponding mean estimated concentration (pg/ml) based on duplicate measurements for each cytokine.

| <b>IL-1a</b> |               |                           | <b>IL-1b</b>  |                        |
|--------------|---------------|---------------------------|---------------|------------------------|
| Dilution     | Conc. (pg/ml) | Estimated Conc.(pg/ml) ** | Conc. (pg/ml) | Estimated Conc.(pg/ml) |
| 1:1          | 6500.00       | 6590.30                   | 15000.00      | 14976.22               |
| 1:3          | 2166.67       | 2147.75                   | 5000.00       | 5063.16                |
| 1:9          | 722.22        | 737.18                    | 1666.67       | 1655.59                |
| 1:27         | 240.74        | 238.99                    | 555.56        | 569.90                 |
| 1:81         | 80.25         | 74.37                     | 185.19        | 175.33                 |
| 1:243        | 26.75         | 17.88                     | 61.73         | 51.34                  |
| 1:729        | 8.92          | 20.74                     | 20.58         | 26.94                  |
| <b>IL-2</b>  |               |                           | <b>IL-4</b>   |                        |
| Dilution     | Conc. (pg/ml) | Estimated Conc.(pg/ml)    | Conc. (pg/ml) | Estimated Conc.(pg/ml) |
| 1:1          | 2700.00       | 2742.60                   | 2000.00       | 2010.02                |
| 1:3          | 900.00        | 921.40                    | 666.67        | 674.19                 |
| 1:9          | 300.00        | 300.30                    | 222.22        | 218.46                 |
| 1:27         | 100.00        | 99.86                     | 74.07         | 77.40                  |
| 1:81         | 33.33         | 33.66                     | 24.69         | 24.02                  |
| 1:243        | 11.11         | 10.54                     | 8.23          | 6.86                   |
| 1:729        | 3.70          | 4.13                      | 2.74          | 2.06                   |
| <b>IL-5</b>  |               |                           | <b>IL-6</b>   |                        |
| Dilution     | Conc. (pg/ml) | Estimated Conc.(pg/ml)    | Conc. (pg/ml) | Estimated Conc.(pg/ml) |
| 1:1          | 1700.00       | 1716.81                   | 2500.00       | 2422.94                |
| 1:3          | 566.67        | 567.52                    | 833.33        | 835.02                 |
| 1:9          | 188.89        | 189.14                    | 277.78        | 277.87                 |
| 1:27         | 62.96         | 62.59                     | 92.59         | 92.36                  |
| 1:81         | 20.99         | 21.45                     | 30.86         | 31.50                  |
| 1:243        | 7.00          | 7.42                      | 10.29         | 9.61                   |
| 1:729        | 2.33          | 1.20                      | 3.43          | 3.27                   |
| <b>IL-8</b>  |               |                           | <b>IL-10</b>  |                        |
| Dilution     | Conc. (pg/ml) | Estimated Conc.(pg/ml)    | Conc. (pg/ml) | Estimated Conc.(pg/ml) |
| 1:1          | 1000.00       | 1014.66                   | 1200.00       | 1195.97                |
| 1:3          | 333.33        | 340.79                    | 400.00        | 402.59                 |
| 1:9          | 111.11        | 108.76                    | 133.33        | 130.72                 |
| 1:27         | 37.04         | 38.75                     | 44.44         | 49.55                  |
| 1:81         | 12.35         | 12.03                     | 14.81         | 8.52                   |
| 1:243        | 4.12          | 3.48                      | 4.94          | 3.68                   |
| 1:729        | 1.37          | 1.21                      | 1.65          | 3.42                   |

\*\* Average of 2 duplicate samples.

**Table S1 (b). Assay Performance Measures (cont'd).** Calibration standard sample concentrations used and the corresponding mean estimated concentration (pg/ml) based on duplicate measurements for each cytokine (cont'd).

| <b>IL-12</b> |               |                           | <b>IL-13</b>  |                        |
|--------------|---------------|---------------------------|---------------|------------------------|
| Dilution     | Conc. (pg/ml) | Estimated Conc.(pg/ml) ** | Conc. (pg/ml) | Estimated Conc.(pg/ml) |
| 1:1          | 5000.00       | 5135.38                   | 2500.00       | 2541.28                |
| 1:3          | 1666.67       | 1679.74                   | 833.33        | 834.09                 |
| 1:9          | 555.56        | 551.65                    | 277.78        | 277.82                 |
| 1:27         | 185.19        | 191.67                    | 92.59         | 92.79                  |
| 1:81         | 61.73         | 57.04                     | 30.86         | 31.44                  |
| 1:243        | 20.58         | 17.72                     | 10.29         | 8.78                   |
| 1:729        | 6.86          | 8.00                      | 3.43          | 3.43                   |
| <b>IL-15</b> |               |                           | <b>IL-17</b>  |                        |
| Dilution     | Conc. (pg/ml) | Estimated Conc.(pg/ml)    | Conc. (pg/ml) | Estimated Conc.(pg/ml) |
| 1:1          | 4000.00       | 4003.80                   | 2000.00       | 1978.70                |
| 1:3          | 1333.33       | 1340.39                   | 666.67        | 688.26                 |
| 1:9          | 444.44        | 447.34                    | 222.22        | 223.15                 |
| 1:27         | 148.15        | 144.33                    | 74.07         | 74.42                  |
| 1:81         | 49.38         | 55.05                     | 24.69         | 23.15                  |
| 1:243        | 16.46         | 21.86                     | 8.23          | 9.85                   |
| 1:729        | 5.49          | 2.47                      | 2.74          | 0.62                   |
| <b>IL-23</b> |               |                           | <b>IFNg</b>   |                        |
| Dilution     | Conc. (pg/ml) | Estimated Conc.(pg/ml)    | Conc. (pg/ml) | Estimated Conc.(pg/ml) |
| 1:1          | 80000.00      | 80078.43                  | 600.00        | 599.75                 |
| 1:3          | 26666.67      | 26658.14                  | 200.00        | 200.30                 |
| 1:9          | 8888.89       | 8915.54                   | 66.67         | 66.48                  |
| 1:27         | 2962.96       | 3036.90                   | 22.22         | 22.45                  |
| 1:81         | 987.65        | 646.82                    | 7.41          | 7.25                   |
| 1:243        | 329.22        | 39.37                     | 2.47          | 2.30                   |
| 1:729        | 109.74        | 804.57                    | 0.82          | 0.74                   |
| <b>TNFa</b>  |               |                           | <b>TNFb</b>   |                        |
| Dilution     | Conc. (pg/ml) | Estimated Conc.(pg/ml)    | Conc. (pg/ml) | Estimated Conc.(pg/ml) |
| 1:1          | 2300.00       | 2343.72                   | 6000.00       | 6018.64                |
| 1:3          | 766.67        | 767.48                    | 2000.00       | 1991.79                |
| 1:9          | 255.56        | 255.89                    | 666.67        | 673.29                 |
| 1:27         | 85.19         | 84.31                     | 222.22        | 219.33                 |
| 1:81         | 28.40         | 29.71                     | 74.07         | 71.23                  |
| 1:243        | 9.47          | 10.09                     | 24.69         | 20.96                  |
| 1:729        | 3.16          | 1.79                      | 8.23          | 10.56                  |

\*\* Average of 2 duplicate samples.

**Table S2. Analysis of Variance.** Significance of subject-to-subject changes in cytokine expression when compared with replicate error based on parametric a one-way ANOVA (ANOVA-1) and the non-parametric Kruskal-Wallis test.

|          |         | p ANOVA-1    |                       | p Kruskal-Wallis |                    |
|----------|---------|--------------|-----------------------|------------------|--------------------|
|          |         | PI-CFS (Log) | Recovering Ctrl (Log) | PI-CFS           | Recovering Control |
| IL-1a    | (pg/ml) | 0.305        | 0.123                 | 0.299            | 0.099              |
| IL-1b    | (pg/ml) | 0.001        | 0.000                 | 0.100            | 0.040              |
| IL-2     | (pg/ml) | 0.064        | 0.015                 | 0.071            | 0.106              |
| IL-4     | (pg/ml) | 0.104        | 0.002                 | 0.173            | 0.235              |
| IL-5     | (pg/ml) | 0.000        | 0.041                 | 0.081            | 0.119              |
| IL-6     | (pg/ml) | 0.000        | 0.000                 | 0.036            | 0.038              |
| IL-8     | (pg/ml) | 0.000        | 0.000                 | 0.035            | 0.030              |
| IL-10    | (pg/ml) | 0.355        | 0.081                 | 0.381            | 0.069              |
| IL-12p70 | (pg/ml) | 0.023        | 0.079                 | 0.099            | 0.160              |
| IL-13    | (pg/ml) | 0.038        | 0.358                 | 0.105            | 0.356              |
| IL-15    | (pg/ml) | 0.000        | 0.000                 | 0.056            | 0.026              |
| IL-17    | (pg/ml) | 0.217        | 0.194                 | 0.226            | 0.378              |
| IL-23    | (pg/ml) | 0.000        | 0.000                 | 0.039            | 0.021              |
| IFN-g    | (pg/ml) | 0.018        | 0.000                 | 0.145            | 0.047              |
| TNFa     | (pg/ml) | 0.003        | 0.000                 | 0.135            | 0.103              |
| TNFb     | (pg/ml) | 0.203        | 0.000                 | 0.181            | 0.312              |

**Table S3. Overview of Results.** Summary statistics and statistical significance of the change in Chalder fatigue score and in the expression in 16 cytokines measured in plasma for the PI-CFS group compared to control subjects.

|                       |         | <b>PI-CFS</b>       |                 | <b>Recovering Ctrl</b> |                   | <b>PI-CFS vs Ctrl</b> |              |
|-----------------------|---------|---------------------|-----------------|------------------------|-------------------|-----------------------|--------------|
|                       |         | Mean (Std. Dev.)    | Median (MADM)   | Mean (Std. Dev.)       | Median (MADM)     | t test                | Wilcoxon     |
| Chalder Fatigue Score |         | 18.33 (5.04)        | 17.00 (3.00)    | 11.00 (3.66)           | 11.00 (0.50)      | <i>0.000</i>          | <i>0.000</i> |
|                       |         |                     |                 |                        |                   | * t test Log(x)       |              |
| IL-1a                 | (pg/ml) | 23.04 (59.95)       | 5.43 (2.76)     | 5.82 (4.23)            | 4.36 (2.91)       | 0.439                 | 0.657        |
| IL-1b                 | (pg/ml) | 31.11 (22.03)       | 22.76 (3.80)    | 50.56 (64.31)          | 23.25 (9.99)      | 0.788                 | 0.684        |
| IL-2                  | (pg/ml) | 26.22 (29.65)       | 13.29 (13.29)   | 5.98 (10.55)           | 1.50 (0.53)       | <i>0.002</i>          | 0.073        |
| IL-4                  | (pg/ml) | 2.16 (0.45)         | 2.31 (0.28)     | 2.57 (2.16)            | 1.96 (0.52)       | 0.921                 | 0.423        |
| IL-5                  | (pg/ml) | 6.90 (4.83)         | 4.66 (0.46)     | 7.88 (2.79)            | 7.80 (2.03)       | 0.110                 | <i>0.026</i> |
| IL-6                  | (pg/ml) | 34.51 (45.05)       | 4.46 (3.63)     | 10.72 (15.91)          | 2.81 (1.93)       | 0.153                 | 0.280        |
| IL-8                  | (pg/ml) | 177.09 (173.55)     | 54.64 (47.21)   | 37.61 (92.38)          | 4.52 (2.32)       | <i>0.000</i>          | <i>0.000</i> |
| IL-10                 | (pg/ml) | 23.67 (17.69)       | 16.70 (6.59)    | 19.03 (17.07)          | 13.04 (3.85)      | 0.330                 | 0.395        |
| IL-12p70              | (pg/ml) | 18.91 (29.46)       | 6.29 (3.65)     | 16.54 (21.24)          | 7.27 (4.76)       | 0.938                 | 0.949        |
| IL-13                 | (pg/ml) | 3.94 (2.70)         | 3.23 (1.05)     | 2.65 (1.24)            | 2.43 (0.54)       | 0.073                 | 0.071        |
| IL-15                 | (pg/ml) | 34.92 (24.00)       | 32.72 (20.17)   | 23.23 (17.88)          | 15.64 (6.89)      | 0.096                 | 0.118        |
| IL-17                 | (pg/ml) | 3.93 (5.21)         | 2.16 (1.49)     | 1.73 (2.03)            | 1.00 (1.00)       | 0.455                 | 0.121        |
| IL-23                 | (pg/ml) | 19798.00 (33373.00) | 542.12 (385.45) | 14077.00 (13724.00)    | 5329.60 (3731.60) | <i>0.012</i>          | <i>0.030</i> |
| IFN-g                 | (pg/ml) | 1.60 (0.83)         | 1.28 (0.16)     | 2.25 (2.18)            | 1.51 (0.38)       | 0.338                 | 0.423        |
| TNFa                  | (pg/ml) | 16.99 (21.15)       | 8.70 (4.18)     | 15.10 (15.40)          | 8.45 (2.52)       | 0.923                 | 0.770        |
| TNFb                  | (pg/ml) | 3.50 (2.90)         | 3.09 (2.11)     | 11.42 (25.88)          | 3.39 (3.39)       | 0.335                 | 0.769        |

**Table S4. Cytokine-cytokine Correlation Structure.** Pearson correlation coefficient  $r$  and associated null probability ( $p$ -value) for co-expression patterns existing between cytokines in the PI-CFS patient group and in the group of recovering control subjects.

| Correlation coefficients with $p$ -value for log transformed concentrations in all PI-CFS groups |              |              |              |              |              |              |              |              |              |              |             |             |              |              |              |              |  |  |
|--------------------------------------------------------------------------------------------------|--------------|--------------|--------------|--------------|--------------|--------------|--------------|--------------|--------------|--------------|-------------|-------------|--------------|--------------|--------------|--------------|--|--|
|                                                                                                  | IL-1a        | IL-1b        | IL-2         | IL-4         | IL-5         | IL-6         | IL-8         | IL-10        | IL-12p70     | IL-13        | IL-15       | IL-17       | IL-23        | IFN-g        | TNFa         | TNFb         |  |  |
| IL-1a                                                                                            | 1.00 (0.00)  | 0.45 (0.06)  | 0.17 (0.51)  | 0.40 (0.10)  | 0.43 (0.07)  | -0.16 (0.51) | -0.27 (0.28) | 0.27 (0.28)  | 0.54 (0.02)  | 0.50 (0.04)  | 0.34 (0.17) | 0.23 (0.36) | 0.34 (0.17)  | 0.10 (0.68)  | 0.28 (0.27)  | 0.30 (0.23)  |  |  |
| IL-1b                                                                                            | 0.45 (0.06)  | 1.00 (0.00)  | 0.62 (0.01)  | 0.55 (0.02)  | 0.65 (0.00)  | -0.05 (0.85) | -0.23 (0.35) | 0.44 (0.07)  | 0.61 (0.01)  | 0.48 (0.04)  | 0.52 (0.03) | 0.53 (0.02) | 0.30 (0.22)  | 0.21 (0.41)  | 0.54 (0.02)  | 0.65 (0.00)  |  |  |
| IL-2                                                                                             | 0.17 (0.51)  | 0.62 (0.01)  | 1.00 (0.00)  | 0.58 (0.01)  | 0.37 (0.13)  | 0.46 (0.05)  | 0.36 (0.15)  | 0.43 (0.08)  | 0.54 (0.02)  | 0.26 (0.30)  | 0.82 (0.00) | 0.58 (0.01) | 0.23 (0.35)  | 0.11 (0.67)  | 0.34 (0.16)  | 0.71 (0.00)  |  |  |
| IL-4                                                                                             | 0.40 (0.10)  | 0.55 (0.02)  | 0.58 (0.01)  | 1.00 (0.00)  | 0.20 (0.43)  | -0.04 (0.86) | -0.17 (0.50) | 0.19 (0.45)  | 0.67 (0.00)  | 0.32 (0.20)  | 0.40 (0.10) | 0.35 (0.15) | 0.17 (0.50)  | -0.19 (0.45) | 0.22 (0.39)  | 0.82 (0.00)  |  |  |
| IL-5                                                                                             | 0.43 (0.07)  | 0.65 (0.00)  | 0.37 (0.13)  | 0.20 (0.43)  | 1.00 (0.00)  | -0.36 (0.14) | -0.43 (0.07) | 0.67 (0.00)  | 0.63 (0.00)  | 0.65 (0.00)  | 0.39 (0.11) | 0.48 (0.05) | 0.77 (0.00)  | 0.64 (0.00)  | 0.70 (0.00)  | 0.35 (0.16)  |  |  |
| IL-6                                                                                             | -0.16 (0.51) | -0.05 (0.85) | 0.46 (0.05)  | -0.04 (0.86) | -0.36 (0.14) | 1.00 (0.00)  | 0.93 (0.00)  | -0.17 (0.50) | -0.19 (0.46) | -0.07 (0.79) | 0.63 (0.01) | 0.02 (0.94) | -0.39 (0.11) | -0.01 (0.96) | -0.17 (0.50) | 0.14 (0.59)  |  |  |
| IL-8                                                                                             | -0.27 (0.28) | -0.23 (0.35) | 0.36 (0.15)  | -0.17 (0.50) | -0.43 (0.07) | 0.93 (0.00)  | 1.00 (0.00)  | -0.21 (0.41) | -0.27 (0.27) | -0.18 (0.48) | 0.51 (0.03) | 0.02 (0.94) | -0.31 (0.21) | 0.02 (0.94)  | -0.21 (0.39) | 0.05 (0.83)  |  |  |
| IL-10                                                                                            | 0.27 (0.28)  | 0.44 (0.07)  | 0.43 (0.08)  | 0.19 (0.45)  | 0.67 (0.00)  | -0.17 (0.50) | -0.21 (0.41) | 1.00 (0.00)  | 0.38 (0.12)  | 0.32 (0.20)  | 0.25 (0.31) | 0.23 (0.35) | 0.57 (0.01)  | 0.41 (0.09)  | 0.62 (0.01)  | 0.43 (0.07)  |  |  |
| IL-12p70                                                                                         | 0.54 (0.02)  | 0.61 (0.01)  | 0.54 (0.02)  | 0.67 (0.00)  | 0.63 (0.00)  | -0.19 (0.46) | -0.27 (0.27) | 0.38 (0.12)  | 1.00 (0.00)  | 0.64 (0.00)  | 0.53 (0.02) | 0.61 (0.01) | 0.68 (0.00)  | 0.34 (0.17)  | 0.66 (0.00)  | 0.60 (0.01)  |  |  |
| IL-13                                                                                            | 0.50 (0.04)  | 0.48 (0.04)  | 0.26 (0.30)  | 0.32 (0.20)  | 0.65 (0.00)  | -0.07 (0.79) | -0.18 (0.48) | 0.32 (0.20)  | 0.64 (0.00)  | 1.00 (0.00)  | 0.50 (0.03) | 0.32 (0.20) | 0.58 (0.01)  | 0.57 (0.01)  | 0.44 (0.07)  | 0.32 (0.20)  |  |  |
| IL-15                                                                                            | 0.34 (0.17)  | 0.52 (0.03)  | 0.82 (0.00)  | 0.40 (0.10)  | 0.39 (0.11)  | 0.63 (0.01)  | 0.51 (0.03)  | 0.25 (0.31)  | 0.53 (0.02)  | 0.50 (0.03)  | 1.00 (0.00) | 0.46 (0.05) | 0.26 (0.29)  | 0.38 (0.12)  | 0.38 (0.12)  | 0.59 (0.01)  |  |  |
| IL-17                                                                                            | 0.23 (0.36)  | 0.53 (0.02)  | 0.58 (0.01)  | 0.35 (0.15)  | 0.48 (0.05)  | 0.02 (0.94)  | 0.02 (0.94)  | 0.23 (0.35)  | 0.61 (0.01)  | 0.32 (0.20)  | 0.46 (0.05) | 1.00 (0.00) | 0.43 (0.07)  | 0.18 (0.47)  | 0.53 (0.02)  | 0.36 (0.14)  |  |  |
| IL-23                                                                                            | 0.34 (0.17)  | 0.30 (0.22)  | 0.23 (0.35)  | 0.17 (0.50)  | 0.77 (0.00)  | -0.39 (0.11) | -0.31 (0.21) | 0.57 (0.01)  | 0.68 (0.00)  | 0.58 (0.01)  | 0.26 (0.29) | 0.43 (0.07) | 1.00 (0.00)  | 0.71 (0.00)  | 0.61 (0.01)  | 0.27 (0.27)  |  |  |
| IFN-g                                                                                            | 0.10 (0.68)  | 0.21 (0.41)  | 0.11 (0.67)  | -0.19 (0.45) | 0.64 (0.00)  | -0.01 (0.96) | 0.02 (0.94)  | 0.41 (0.09)  | 0.34 (0.17)  | 0.57 (0.01)  | 0.38 (0.12) | 0.18 (0.47) | 0.71 (0.00)  | 1.00 (0.00)  | 0.63 (0.00)  | 0.12 (0.63)  |  |  |
| TNFa                                                                                             | 0.28 (0.27)  | 0.54 (0.02)  | 0.34 (0.16)  | 0.22 (0.39)  | 0.70 (0.00)  | -0.17 (0.50) | -0.21 (0.39) | 0.62 (0.01)  | 0.66 (0.00)  | 0.44 (0.07)  | 0.38 (0.12) | 0.53 (0.02) | 0.61 (0.01)  | 0.63 (0.00)  | 1.00 (0.00)  | 0.46 (0.06)  |  |  |
| TNFb                                                                                             | 0.30 (0.23)  | 0.65 (0.00)  | 0.71 (0.00)  | 0.82 (0.00)  | 0.35 (0.16)  | 0.14 (0.59)  | 0.05 (0.83)  | 0.43 (0.07)  | 0.60 (0.01)  | 0.32 (0.20)  | 0.59 (0.01) | 0.36 (0.14) | 0.27 (0.27)  | 0.12 (0.63)  | 0.46 (0.06)  | 1.00 (0.00)  |  |  |
| Correlation coefficients with $p$ -value for log transformed concentrations in Ctrl group only   |              |              |              |              |              |              |              |              |              |              |             |             |              |              |              |              |  |  |
|                                                                                                  | IL-1a        | IL-1b        | IL-2         | IL-4         | IL-5         | IL-6         | IL-8         | IL-10        | IL-12p70     | IL-13        | IL-15       | IL-17       | IL-23        | IFN-g        | TNFa         | TNFb         |  |  |
| IL-1a                                                                                            | 1.00 (0.00)  | 0.25 (0.24)  | 0.21 (0.33)  | 0.23 (0.28)  | 0.12 (0.59)  | -0.17 (0.42) | -0.50 (0.01) | 0.02 (0.94)  | 0.32 (0.13)  | 0.18 (0.41)  | 0.12 (0.59) | 0.12 (0.57) | 0.00 (1.00)  | 0.20 (0.36)  | -0.04 (0.87) | 0.14 (0.52)  |  |  |
| IL-1b                                                                                            | 0.25 (0.24)  | 1.00 (0.00)  | 0.33 (0.12)  | 0.79 (0.00)  | 0.62 (0.00)  | 0.48 (0.02)  | 0.01 (0.98)  | 0.24 (0.26)  | 0.65 (0.00)  | 0.57 (0.00)  | 0.90 (0.00) | 0.45 (0.03) | 0.22 (0.30)  | 0.53 (0.01)  | 0.83 (0.00)  | 0.56 (0.00)  |  |  |
| IL-2                                                                                             | 0.21 (0.33)  | 0.33 (0.12)  | 1.00 (0.00)  | 0.03 (0.89)  | -0.04 (0.87) | 0.06 (0.77)  | -0.05 (0.83) | 0.31 (0.14)  | 0.37 (0.07)  | 0.50 (0.01)  | 0.32 (0.13) | 0.30 (0.15) | 0.44 (0.03)  | -0.32 (0.12) | -0.01 (0.98) | 0.20 (0.35)  |  |  |
| IL-4                                                                                             | 0.23 (0.28)  | 0.79 (0.00)  | 0.03 (0.89)  | 1.00 (0.00)  | 0.31 (0.14)  | 0.40 (0.06)  | -0.05 (0.83) | -0.21 (0.32) | 0.64 (0.00)  | 0.40 (0.05)  | 0.57 (0.00) | 0.36 (0.08) | -0.03 (0.90) | 0.58 (0.00)  | 0.77 (0.00)  | 0.80 (0.00)  |  |  |
| IL-5                                                                                             | 0.12 (0.59)  | 0.62 (0.00)  | -0.04 (0.87) | 0.31 (0.14)  | 1.00 (0.00)  | 0.21 (0.33)  | 0.04 (0.87)  | 0.45 (0.03)  | 0.42 (0.04)  | 0.07 (0.76)  | 0.77 (0.00) | 0.08 (0.72) | 0.20 (0.35)  | 0.54 (0.01)  | 0.54 (0.01)  | -0.11 (0.61) |  |  |
| IL-6                                                                                             | -0.17 (0.42) | 0.48 (0.02)  | 0.06 (0.77)  | 0.40 (0.06)  | 0.21 (0.33)  | 1.00 (0.00)  | 0.67 (0.00)  | 0.36 (0.09)  | 0.29 (0.17)  | 0.32 (0.12)  | 0.44 (0.03) | 0.44 (0.03) | -0.11 (0.63) | 0.33 (0.11)  | 0.46 (0.03)  | 0.32 (0.13)  |  |  |
| IL-8                                                                                             | -0.50 (0.01) | 0.01 (0.98)  | -0.05 (0.83) | -0.05 (0.83) | 0.04 (0.87)  | 0.67 (0.00)  | 1.00 (0.00)  | 0.43 (0.04)  | -0.15 (0.49) | -0.08 (0.71) | 0.09 (0.66) | 0.19 (0.38) | -0.19 (0.38) | -0.13 (0.56) | 0.09 (0.68)  | -0.08 (0.71) |  |  |
| IL-10                                                                                            | 0.02 (0.94)  | 0.24 (0.26)  | 0.31 (0.14)  | -0.21 (0.32) | 0.45 (0.03)  | 0.36 (0.09)  | 0.43 (0.04)  | 1.00 (0.00)  | 0.05 (0.81)  | 0.07 (0.73)  | 0.45 (0.03) | 0.07 (0.76) | 0.41 (0.04)  | -0.09 (0.68) | 0.15 (0.48)  | -0.35 (0.09) |  |  |
| IL-12p70                                                                                         | 0.32 (0.13)  | 0.65 (0.00)  | 0.37 (0.07)  | 0.64 (0.00)  | 0.42 (0.04)  | 0.29 (0.17)  | -0.15 (0.49) | 0.05 (0.81)  | 1.00 (0.00)  | 0.37 (0.08)  | 0.57 (0.00) | 0.31 (0.14) | 0.36 (0.09)  | 0.56 (0.00)  | 0.53 (0.01)  | 0.47 (0.02)  |  |  |
| IL-13                                                                                            | 0.18 (0.41)  | 0.57 (0.00)  | 0.50 (0.01)  | 0.40 (0.05)  | 0.07 (0.76)  | 0.32 (0.12)  | -0.08 (0.71) | 0.07 (0.73)  | 0.37 (0.08)  | 1.00 (0.00)  | 0.51 (0.01) | 0.58 (0.00) | 0.19 (0.38)  | 0.05 (0.83)  | 0.35 (0.09)  | 0.50 (0.01)  |  |  |
| IL-15                                                                                            | 0.12 (0.59)  | 0.90 (0.00)  | 0.32 (0.13)  | 0.57 (0.00)  | 0.77 (0.00)  | 0.44 (0.03)  | 0.09 (0.66)  | 0.45 (0.03)  | 0.57 (0.00)  | 0.51 (0.01)  | 1.00 (0.00) | 0.39 (0.06) | 0.39 (0.06)  | 0.45 (0.03)  | 0.81 (0.00)  | 0.29 (0.17)  |  |  |
| IL-17                                                                                            | 0.12 (0.57)  | 0.45 (0.03)  | 0.30 (0.15)  | 0.36 (0.08)  | 0.08 (0.72)  | 0.44 (0.03)  | 0.19 (0.38)  | 0.07 (0.76)  | 0.31 (0.14)  | 0.58 (0.00)  | 0.39 (0.06) | 1.00 (0.00) | 0.13 (0.56)  | 0.15 (0.49)  | 0.33 (0.12)  | 0.33 (0.11)  |  |  |
| IL-23                                                                                            | 0.00 (1.00)  | 0.22 (0.30)  | 0.44 (0.03)  | -0.03 (0.90) | 0.20 (0.35)  | -0.11 (0.63) | -0.19 (0.38) | 0.41 (0.04)  | 0.36 (0.09)  | 0.19 (0.38)  | 0.39 (0.06) | 0.13 (0.56) | 1.00 (0.00)  | 0.09 (0.67)  | 0.26 (0.21)  | -0.06 (0.79) |  |  |
| IFN-g                                                                                            | 0.20 (0.36)  | 0.53 (0.01)  | -0.32 (0.12) | 0.58 (0.00)  | 0.54 (0.01)  | 0.33 (0.11)  | -0.13 (0.56) | -0.09 (0.68) | 0.56 (0.00)  | 0.05 (0.83)  | 0.45 (0.03) | 0.15 (0.49) | 0.09 (0.67)  | 1.00 (0.00)  | 0.57 (0.00)  | 0.27 (0.20)  |  |  |
| TNFa                                                                                             | -0.04 (0.87) | 0.83 (0.00)  | -0.01 (0.98) | 0.77 (0.00)  | 0.54 (0.01)  | 0.46 (0.03)  | 0.09 (0.68)  | 0.15 (0.48)  | 0.53 (0.01)  | 0.35 (0.09)  | 0.81 (0.00) | 0.33 (0.12) | 0.26 (0.21)  | 0.57 (0.00)  | 1.00 (0.00)  | 0.48 (0.02)  |  |  |
| TNFb                                                                                             | 0.14 (0.52)  | 0.56 (0.00)  | 0.20 (0.35)  | 0.80 (0.00)  | -0.11 (0.61) | 0.32 (0.13)  | -0.08 (0.71) | -0.35 (0.09) | 0.47 (0.02)  | 0.50 (0.01)  | 0.29 (0.17) | 0.33 (0.11) | -0.06 (0.79) | 0.27 (0.20)  | 0.48 (0.02)  | 1.00 (0.00)  |  |  |

**Table S5. Alternative Classification Models.** Performance of linear classification models were IL-5 has been substituted for IL-23 or IFN- $\gamma$  or both to resolve collinearity issues with the latter by simple truncation. Statistics are shown for classification performance where a 90% confidence in assignment is imposed (Linear cw 90% conf.) and where the score alone is considered (Linear uncorrected).

|                           | Classification based on IL-2, 6, 8, 5, IFN $\gamma$ |                    | Classification based on IL-2, 6, 8, 23, 5 |                    | Classification based on IL-2, 6, 8, 5 |                    |
|---------------------------|-----------------------------------------------------|--------------------|-------------------------------------------|--------------------|---------------------------------------|--------------------|
|                           | Linear cw 90% Conf                                  | Linear uncorrected | Linear cw 90% Conf                        | Linear uncorrected | Linear cw 90% Conf                    | Linear uncorrected |
| Correct Rate              | 0.96                                                | 0.88               | 0.92                                      | 0.86               | 0.96                                  | 0.83               |
| Error Rate                | 0.04                                                | 0.12               | 0.08                                      | 0.14               | 0.04                                  | 0.17               |
| Inconclusive Rate         | 0.36                                                | 0.00               | 0.40                                      | 0.00               | 0.38                                  | 0.00               |
| Classified Rate           | 0.64                                                | 1.00               | 0.60                                      | 1.00               | 0.62                                  | 1.00               |
| Sensitivity               | 0.61                                                | 0.89               | 0.56                                      | 0.89               | 0.56                                  | 0.89               |
| Specificity               | 0.63                                                | 0.88               | 0.54                                      | 0.83               | 0.63                                  | 0.79               |
| Positive Predictive Value | 0.55                                                | 0.84               | 0.48                                      | 0.80               | 0.53                                  | 0.76               |
| Negative Predictive Value | 0.68                                                | 0.91               | 0.62                                      | 0.91               | 0.65                                  | 0.90               |
| Positive Likelihood       | 1.63                                                | 7.11               | 1.21                                      | 5.33               | 1.48                                  | 4.27               |
| Negative Likelihood       | 0.62                                                | 0.13               | 0.82                                      | 0.13               | 0.71                                  | 0.14               |

**Table S6. Sensitivity study of n=4 Absent PI-CFS Profiles.** In order to assess the impact of the n=4 sets of duplicate cytokine profiles missing from the n=13 PI-CFS subject group, a series of 20, 50 and 100 simulation experiments were conducted. In each experiment a random set of n=4 sets of duplicate samples were selected from the recovered control data and added to the PI-CFS set. A stepwise regression model was then used to select discriminating cytokines based on this artificially augmented data. Below is the frequency with which each cytokine was selected in the 50 regression models.

|                                 | IL-1a | IL-1b | IL-2 | IL-4 | IL-5 | IL-6 | IL-8 | IL-10 | IL-12p70 | IL-13 | IL-15 | IL-17 | IL-23 | IFNg | TNFa | TNFb |
|---------------------------------|-------|-------|------|------|------|------|------|-------|----------|-------|-------|-------|-------|------|------|------|
| 20 iterations                   | 13    | 0     | 0    | 1    | 0    | 17   | 20   | 0     | 0        | 7     | 1     | 2     | 8     | 0    | 0    | 0    |
| 20 iterations                   | 11    | 0     | 0    | 1    | 0    | 15   | 20   | 0     | 1        | 5     | 0     | 3     | 6     | 0    | 0    | 1    |
| 50 iterations                   | 34    | 1     | 0    | 0    | 0    | 42   | 50   | 0     | 2        | 15    | 1     | 4     | 17    | 1    | 0    | 2    |
| 50 iterations                   | 30    | 1     | 0    | 0    | 0    | 35   | 50   | 0     | 2        | 10    | 2     | 4     | 11    | 1    | 0    | 3    |
| 100 iterations                  | 70    | 7     | 0    | 1    | 0    | 77   | 99   | 1     | 3        | 28    | 7     | 12    | 29    | 1    | 0    | 2    |
| 100 iterations                  | 65    | 3     | 0    | 0    | 0    | 80   | 100  | 0     | 3        | 31    | 10    | 11    | 34    | 2    | 0    | 5    |
| Average Selection Frequency (%) | 64    | 2     | 0    | 2    | 0    | 79   | 100  | 0     | 3        | 28    | 5     | 11    | 32    | 1    | 0    | 4    |
